# Supplementary material for: Effectiveness of a Regional Prepregnancy Care Program in Women With Type 1 and Type 2 Diabetes
Source: Oxford University Press journal article supplement (doi:10.2337/dc10-1113), 2010-11-29
Supplement: dc101113onlineappendix.pdf [file dc101113onlineappendix.pdf]

**Table 5: Effects of prepregnancy care by type of diabetes**

|                                      | Type 1 diabetes (n=405) |                |         | Type 2 diabetes (n=271) |                |         |
|--------------------------------------|-------------------------|----------------|---------|-------------------------|----------------|---------|
|                                      | PPC                     | No PPC         | p value | PPC                     | No PPC         | p value |
| <b>Demographics<sup>1</sup></b>      | <u>N=127</u>            | <u>N=278</u>   |         | <u>N=53</u>             | <u>N=218</u>   |         |
| Age*                                 | 31 (25-38)              | 29 (20-38)     | <0.0001 | 35 (27-39)              | 34 (25-40)     | 0.3     |
| White Ethnicity                      | 122 (96.1%)             | 266 (95.7%)    | 0.6     | 44 (83.0%)              | 119 (54.6%)    | 0.001   |
| Area of deprivation                  | 47 (37.6%)              | 137 (49.6%)    | 0.1     | 25 (49%)                | 135 (62.2%)    | 0.03    |
| BMI at booking*                      | 24.7 (21-31)            | 25.7 (22-32)   | 0.04    | 33.9 (26-40)            | 32.2 (24-43)   | 0.8     |
| <b>Glycaemic control (HbA1c %)**</b> |                         |                |         |                         |                |         |
| Prepregnancy*                        | 7.4 (6.5-9.0)           | 8.6 (6.5-12.1) | <0.0001 | 6.6 (5.6-8.1)           | 7.1 (5.7-10.8) | <0.0001 |
| Booking ≤ 7.0%                       | 43 (47.3%)              | 46 (26.1%)     | 0.0009  | 29 (67.4%)              | 66 (54.5%)     | 0.2     |
| Trimester 1*                         | 6.9 (6.2-8.4)           | 7.8 (6.1-9.8)  | <0.0001 | 6.4 (5.5-7.7)           | 6.8 (5.7-8.8)  | 0.007   |
| Trimester 2*                         | 6.5 (5.7-7.5)           | 7.0 (5.7-8.5)  | <0.0001 | 5.9 (5.1-6.7)           | 6.0 (5.2-7.3)  | 0.03    |
| Trimester 3*                         | 6.6 (5.6-7.5)           | 6.8 (5.6-8.4)  | 0.003   | 6.1 (5.2-6.9)           | 6.2 (5.2-7.3)  | 0.2     |
| <b>Preparation for pregnancy</b>     |                         |                |         |                         |                |         |
| EASIPD leaflet                       | 53 (47.8%)              | 52 (20.5%)     | <0.0001 | 15 (33.3%)              | 15 (7.6%)      | <0.0001 |
| Therapy at conception                |                         |                |         |                         |                |         |
| Diet only                            | 0                       | 0              |         | 4 (7.5%)                | 68 (31.2%)     | 0.0009  |
| Insulin                              | 100%                    | 100%           |         | 38 (74.5%)              | 38 (17.4%)     | <0.0001 |
| ACE inhibitor                        | 1 (0.8%)                | 5 (1.8%)       | 0.7     | 1 (1.9%)                | 18 (8.3%)      | 0.2     |
| Statin                               | 0 (0%)                  | 7 (2.5%)       | 0.2     | 0                       | 31 (14.2%)     | 0.007   |
| Metformin                            | 9 (7.1%)                | 4 (1.4%)       | 0.007   | 31 (58.5%)              | 119 (54.6%)    | 0.7     |
| Folic acid 5mg                       | 111 (89.5%)             | 69 (28.6%)     | <0.0001 | 45 (84.9%)              | 41 (23.3%)     | <0.0001 |
| Booking gestation*                   | 6.6 (4.4-9.9)           | 7.6 (5-14)     | <0.0001 | 7.3 (5-12)              | 7.9 (5-15)     | 0.04    |
| <b>Pregnancy outcome<sup>2</sup></b> | <u>N=106</u>            | <u>N=228</u>   |         | <u>N=45</u>             | <u>N=177</u>   |         |
| Malformation                         | 1 (0.9%)                | 13 (5.7%)      | 0.08    | 0                       | 10 (5.6%)      | 0.2     |
| Stillbirth                           | 1                       | 4              | 0.9     | 0                       | 2              | 0.9     |
| Neonatal death                       | 0                       | 3              | 0.6     | 0                       | 0              |         |
| Perinatal mortality                  | 1                       | 7              | 0.4     | 0                       | 2              | 0.9     |
| Serious adverse outcome              | 2 (1.9%)                | 20 (8.8%)      | 0.03    | 0                       | 12 (6.8%)      | 0.2     |

<sup>1</sup>Maternal demographics, glycaemic control and indicators of pregnancy preparation are reported for 676 pregnancies. Pregnancies in women who moved into the area during pregnancy (n=6) and those in women with neither type 1 nor type 2 diabetes (n=4) are excluded.

\*Variables are reported as median (10<sup>th</sup>-90<sup>th</sup> centile)

\*\* 38/401 (9.4%) women with type 1 diabetes used insulin pump therapy before or during pregnancy

<sup>2</sup> Pregnancy outcomes are reported for 556 pregnancies (includes all pregnancies > 20 weeks gestation and all terminations for congenital malformation) in mothers with documented type 1 and type 2 diabetes.

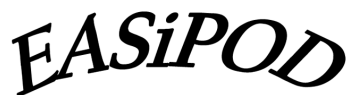

Centre:

Patient code:

East Anglia Study Group  
Improving Pregnancy Outcomes  
In Diabetes

[Submit by Email](#)

[Print Form](#)

## Regional Prepregnancy Care Proforma

Gravida  Parity  DOB (eg 31/1/1980):  Post code:

### Type of diabetes:

- ☐ Type 1   ☐ Other (specify)   
☐ Type 2

### Diabetes complications

- ☐ Retinopathy   ☐ Neuropathy  
☐ Nephropathy   ☐ Vascular

### Ethnicity

- ☐ Caucasian   ☐ Other (please state)   
☐ Afro-Caribbean     
☐ Asian

### Folic acid:

- ☐ None  
☐ 400µg / day  
☐ 5 mg / day

Started:

### Diabetes therapy:

- ☐ Diet alone  
☐ Insulin  
☐ Sulphonylurea  
☐ Metformin  
☐ Glitazone  
☐ Acarbose

Other (specify)

### Other therapy:

- ☐ Statin  
☐ ACE inhibitor  
☐ Antidepressant  
☐ Anti-epileptic  
☐ Other

### Insulin therapy:

- ☐ Pump  
☐ Injections   Number   
Total daily dose (Units)

**EASiPOD**   ☐ Yes

**Leaflet read**   ☐ No

**Rubella**   ☐ Yes

**immune**   ☐ No

Blood glucose monitoring:

Weight (kg):  Height (m):  Contraception:  Smoking:

**Prepregnancy care health professionals seen:**   ☐ DSN   ☐ Dietician   ☐ Obstetrician  
☐ Midwife   ☐ Physician   ☐ Multidisciplinary Team

Current HbA1c:  Target HbA1c:

**Severe hypo**   ☐ Yes

**In last 12 mths:**   ☐ No

**DKA in**   ☐ Yes

**last 12 mths:**   ☐ No

### Risks discussed: (CEMACH figures)

- ☐ Hypoglycaemia / Warning signs change  
☐ DKA  
☐ Pre-eclampsia increased risk  
☐ Caesarean delivery rate 66%  
☐ Congenital malformation 2x greater risk  
☐ Stillbirth 5x greater risk  
☐ Perinatal death 3x greater risk  
☐ Macrosomia risk 50%  
☐ Premature delivery 3x greater risk  
☐ Increased BMI

### Follow-up prepregnancy visits

Date:  HbA1c

Date:  HbA1c

Date:  HbA1c

Date:  HbA1c

Date:  HbA1c

Number of phone contacts:

Number of clinic visits:
